# Supplementary material for: Interventions to promote access to eyecare for non-dominant ethnic groups in high-income countries: a scoping review
Source: PubMed Central journal article supplement (PMC8424858; doi:10.1136/bmjgh-2021-006188), 2021-09-07
Supplement: bmjgh-2021-006188supp001.pdf [file bmjgh-2021-006188supp001.pdf]

# Supplementary File 1

**Table S1.1.** Published Literature Search strategy - example for one database

- 1 exp Ophthalmology/ (21885)
- 2 Optometry/ (5403)
- 3 ((eye\$ or ocular or vision) adj2 (care or health or service\$)).tw. (6849)
- 4 visual acuity.tw. (59866)
- 5 (ophthalm\$ or optomet\$).tw. (100106)
- 6 exp Eye Diseases/ (543545)
- 7 (glaucoma\$ or ocular hypertension or cataract\$).tw. (103115)
- 8 ((diabet\$ or proliferat\$) adj3 retinopath\$).tw. (23455)
- 9 (diabet\$ adj3 (eye\$ or vision or visual\$ or sight\$)).tw. (4324)
- 10 (retinopath\$ adj3 (eye\$ or vision or visual\$ or sight\$)).tw. (1996)
- 11 (dilated adj2 fundus).tw. (561)
- 12 (retinal adj2 exam\$).tw. (1497)
- 13 (myop\$ or hyperop\$ or hypermetrop\$ or anisotrop\$ or ammetrop\$ or astigmati\$ or presbyop\$).tw. (60420)
- 14 (refractive adj1 error\$).tw. (8930)
- 15 Eyeglasses/ (7396)
- 16 (spectacle or spectacles or glasses).tw. (17268)
- 17 (eyeglasses or eye glasses).tw. (793)
- 18 or/1-17 (676343)
- 19 Ethnic Groups/ (58731)
- 20 Minority Groups/ (13034)
- 21 ((ethnic\$ or racial\$ or cultur\$) adj3 (group\$ or minorit\$ or population\$ or diverse\$ or origin\$)).tw. (79505)
- 22 ((ethnic\$ or racial\$ or cultur\$) adj3 (inequalit\$ or inequit\$ or disparit\$ or equit\$ or disadvantage\$ or depriv\$)).tw. (12388)
- 23 ((population\$ or communit\$) adj3 (divers\$ or disadvantage\$ or depriv\$)).tw. (31840)
- 24 non-Indigenous.tw. (1904)
- 25 (visible adj1 minorit\$).tw. (179)
- 26 Refugees/ (9393)
- 27 "emigrants and immigrants"/ (10951)
- 28 (migrant\$ or immigrant\$ or emigrant\$ or refugee\$).tw. (46175)
- 29 asylum seeker\$.tw. (1373)
- 30 Urban Population/ (56887)
- 31 urban poor.tw. (696)
- 32 Cultural Characteristics/ (15856)
- 33 Cross-Cultural Comparison/ (24923)
- 34 Cultural Diversity/ (10999)
- 35 Cultural competency/ (4994)
- 36 Cultural deprivation/ (1142)
- 37 exp African Continental Ancestry Group/ (82727)
- 38 exp Asian Continental Ancestry Group/ (67897)
- 39 Continental Population Groups/ (20766)
- 40 (Afr\$ adj2 American\$).tw. (51367)
- 41 (Afr\$ adj2 Caribbean\$).tw. (2292)
- 42 (west adj2 (india\$ or indies)).tw. (4801)
- 43 (American\$ adj1 black).tw. (2053)
- 44 (Asian\$ or Indian\$ or Pakistan\$ or Bangladesh\$ or Bengal\$).tw. (181277)
- 45 Pacific.tw. (31669)
- 46 (Hispanic or Latino or Latin American\$ or Puerto Ric\$ or Mexican\$).tw. (81920)
- 47 or/19-46 (667128)
- 48 Program Evaluation/ (59786)
- 49 program\$.tw. (809937)

50 ((educat\$ or behaviour\$ or behavior\$ or improv\$) adj3 (intervention\$ or activat\$)).tw. (76474)  
51 Delivery of Health Care/ (84907)  
52 Health Services Accessibility/ (69393)  
53 Patient Acceptance of Health Care/ (42735)  
54 Health Promotion/ (69909)  
55 (health adj2 (promotion\$ or knowledge or belief\$)).tw. (39822)  
56 Health Education/ (59039)  
57 (educat\$ adj2 (information or material or leaflet)).tw. (6826)  
58 Health Knowledge, Attitudes, Practice/ (103696)  
59 Patient Education as Topic/ (82258)  
60 Persuasive Communication/ (3553)  
61 "Surveys and Questionnaires"/ (429592)  
62 Questionnaires/ (429592)  
63 Focus Groups/ (27030)  
64 Health Surveys/ (59635)  
65 Health Care Surveys/ (30884)  
66 Interviews as Topic/ (57899)  
67 (questionnaire\$ or survey\$).tw. (956462)  
68 (focus adj3 group\$).tw. (42736)  
69 exp Reminder Systems/ (3237)  
70 remind\$.tw. (18000)  
71 Telephone/ (11288)  
72 telephone.tw. (54222)  
73 phone call.tw. (1179)  
74 Health Behavior/ (47125)  
75 Behavior Therapy/ (26940)  
76 (behavioral or behaviour\$).tw. (521647)  
77 (increas\$ adj3 (attend\$ or uptake)).tw. (33089)  
78 (approachability or acceptability or availability or affordability or appropriateness).tw. (248806)  
79 (ability adj2 (perceive or seek or reach or pay or engage)).tw. (3494)  
80 exp Vision Tests/ (99239)  
81 Mass Screening/ (98002)  
82 (vision adj3 (test\$ or screen\$ or assess\$)).tw. (4649)  
83 (eye\$ adj3 (test\$ or screen\$ or assess\$)).tw. (8507)  
84 ((target\$ or tailor\$) adj3 intervention\$).tw. (48273)  
85 (cultural\$ adj3 (sensitiv\$ or appropriate)).tw. (9151)  
86 or/48-85 (3037015)  
87 18 and 47 and 86 (4539)  
88 exp developing countries/ (72422)  
89 87 not 88 (4463)  
90 prevalence.ti. (123792)  
91 89 not 90 (3984)  
92 exp case report/ (2028133)  
93 (case\$ adj3 (report\$ or series)).tw. (739059)  
94 92 or 93 (2268229)  
95 91 not 94 (3572)  
96 chi.lg. (313127)  
97 95 not 96 (3550)  
98 limit 97 to yr="1990 -Current" (3275)

**Table S1.2. Grey Literature Search Strategy and Selection**

All searches took place on 22/07/2021, and all resources were screened, selected and data was extracted between 22/07/2021 and 30/07/2021.

|                                 | SEARCH SOURCE AND STRING                                                                                                                     | NO. OF HITS | NO. IDENTIFIED FOR SCREENING | NO. IDENTIFIED FOR FULL TEXT REVIEW | NO. INCLUDED FOR EXTRACTION |
|---------------------------------|----------------------------------------------------------------------------------------------------------------------------------------------|-------------|------------------------------|-------------------------------------|-----------------------------|
| <b>Google Advanced Searches</b> |                                                                                                                                              |             |                              |                                     |                             |
| 1                               | "ethnic minority" AROUND(3) eyecare OR eye OR "visual impairment" OR cataract OR "refractive error" OR "diabetic retinopathy" OR glaucoma    | 39          | 5 (checked all)              | 4                                   | 4                           |
| 2                               | "ethnicity" AROUND(3) eyecare OR eye OR "visual impairment" OR cataract OR "refractive error" OR "diabetic retinopathy" OR glaucoma          | 77          | 1 (checked all)              | 1                                   | 0                           |
| 3                               | "non-dominant" AROUND(3) eyecare OR eye OR "visual impairment" OR cataract OR "refractive error" OR "diabetic retinopathy" OR glaucoma       | >100        | 0 (checked 1st 20)           | 0                                   | 0                           |
| 4                               | "Black" AROUND(3) eyecare OR eye OR "visual impairment" OR cataract OR "refractive error" OR "diabetic retinopathy" OR glaucoma              | >100        | 0 (checked 1st 20)           | 0                                   | 0                           |
| 5                               | "African American" AROUND(3) eyecare OR eye OR "visual impairment" OR cataract OR "refractive error" OR "diabetic retinopathy" OR glaucoma   | >100        | 6 (checked 1st 50)           | 6                                   | 0                           |
| 6                               | "Latinx" AROUND(3) eyecare OR eye OR "visual impairment" OR cataract OR "refractive error" OR "diabetic retinopathy" OR glaucoma             | 59          | 3 (checked all)              | 3                                   | 1                           |
| 7                               | "Latino" AROUND(3) eyecare OR eye OR "visual impairment" OR cataract OR "refractive error" OR "diabetic retinopathy" OR glaucoma             | >100        | 13 (checked 1st 50)          | 6                                   | 2                           |
| 8                               | "Hispanic" AROUND(3) eyecare OR eye OR "visual impairment" OR cataract OR "refractive error" OR "diabetic retinopathy" OR glaucoma           | >100        | 6 (checked 1st 50)           | 6                                   | 3                           |
| 9                               | "Pacific" AROUND(3) eyecare OR eye OR "visual impairment" OR cataract OR "refractive error" OR "diabetic retinopathy" OR glaucoma            | 72          | 0 (checked 1st 20)           | 0                                   | 0                           |
| 10                              | "Asian" AROUND(3) eyecare OR eye OR "visual impairment" OR cataract OR "refractive error" OR "diabetic retinopathy" OR glaucoma              | >100        | 0 (checked 1st 20)           | 0                                   | 0                           |
| 11                              | "Indian" AROUND(3) eyecare OR eye OR "visual impairment" OR cataract OR "refractive error" OR "diabetic retinopathy" OR glaucoma             | >100        | 0 (checked 1st 20)           | 0                                   | 0                           |
| 12                              | "Improving access" AROUND(3) eyecare OR eye OR "visual impairment" OR cataract OR "refractive error" OR "diabetic retinopathy" OR glaucoma   | >100        | 8 (checked 1st 50)           | 6                                   | 2                           |
| 13                              | "Improve access" AROUND(3) eyecare OR eye OR "visual impairment" OR cataract OR "refractive error" OR "diabetic retinopathy" OR glaucoma     | >100        | 6 (checked 1st 50)           | 2                                   | 0                           |
| 14                              | "Equity" AROUND(3) eyecare OR eye OR "visual impairment" OR cataract OR "refractive error" OR "diabetic retinopathy" OR glaucoma             | >100        | 2 (checked 1st 50)           | 1                                   | 0                           |
| 15                              | "Intervention improve access" AROUND(3) eyecare OR eye OR "visual impairment" OR cataract OR "refractive error" OR "diabetic retinopathy" OR | 0           | (adds only)                  | 0                                   | 0                           |

| glaucoma                                      |                                                                                                                                       |    |   |   |   |
|-----------------------------------------------|---------------------------------------------------------------------------------------------------------------------------------------|----|---|---|---|
| <b>Grey Literature databases</b>              |                                                                                                                                       |    |   |   |   |
| <b>Grey Lit</b>                               |                                                                                                                                       |    |   |   |   |
| 16                                            | "ethnicity" AND (eyecare OR eye OR "visual impairment" OR cataract OR "refractive error" OR "diabetic retinopathy" OR glaucoma)       | 0  | 0 | 0 | 0 |
| 17                                            | eyecare                                                                                                                               | 10 | 0 | 0 | 0 |
| <b>Guidelines International Network 'GIN'</b> |                                                                                                                                       |    |   |   |   |
| 18                                            | "ethnicity" AROUND(3) eyecare OR eye OR "visual impairment" OR cataract OR "refractive error" OR "diabetic retinopathy" OR glaucoma   | 0  | 0 | 0 | 0 |
| 19                                            | "ethnicity" AND (eyecare OR eye OR "visual impairment" OR cataract OR "refractive error" OR "diabetic retinopathy" OR glaucoma)       | 0  | 0 | 0 | 0 |
| 20                                            | eyecare                                                                                                                               | 0  | 0 | 0 | 0 |
| 21                                            | "eye care"                                                                                                                            | 2  | 0 | 0 | 0 |
| <b>Open Grey</b>                              |                                                                                                                                       |    |   |   |   |
| 22                                            | "ethnicity" AROUND(3) (eyecare OR eye OR "visual impairment" OR cataract OR "refractive error" OR "diabetic retinopathy" OR glaucoma) | 0  | 0 | 0 | 0 |
| 23                                            | "ethnicity" AND (eyecare OR eye OR "visual impairment" OR cataract OR "refractive error" OR "diabetic retinopathy" OR glaucoma)       | 3  | 0 | 0 | 0 |
| 24                                            | access to eyecare ethnic minorities                                                                                                   | 0  | 0 | 0 | 0 |
| 25                                            | eyecare                                                                                                                               | 0  | 0 | 0 | 0 |
| 26                                            | "eye care"                                                                                                                            | 4  | 1 | 0 | 0 |
| <b>Trip Database</b>                          |                                                                                                                                       |    |   |   |   |
| 27                                            | "ethnicity" AROUND(3) (eyecare OR eye OR "visual impairment" OR cataract OR "refractive error" OR "diabetic retinopathy" OR glaucoma) | 0  | 0 | 0 | 0 |
| 28                                            | "ethnicity" AND (eyecare OR eye OR "visual impairment" OR cataract OR "refractive error" OR "diabetic retinopathy" OR glaucoma)       | 0  | 0 | 0 | 0 |
| 29                                            | access to eyecare ethnic minorities                                                                                                   | 0  | 0 | 0 | 0 |
| 30                                            | eyecare AND ethnicity                                                                                                                 | 4  | 0 | 0 | 0 |
| <b>Total Extraction</b>                       |                                                                                                                                       |    |   |   |   |
| 12<br>(all from google searches)              |                                                                                                                                       |    |   |   |   |

**Table S1.3.** Websites used for data extraction after grey lit search

| Resources                                                                                                                                                                                                                                                                                                                                                                                                                                                                                                | Initiative(s)                                                            | Year<br>Target<br>populati<br>on<br>Target<br>conditio<br>n<br>Country | Approach                                                                                                                                                                                                                                           |
|----------------------------------------------------------------------------------------------------------------------------------------------------------------------------------------------------------------------------------------------------------------------------------------------------------------------------------------------------------------------------------------------------------------------------------------------------------------------------------------------------------|--------------------------------------------------------------------------|------------------------------------------------------------------------|----------------------------------------------------------------------------------------------------------------------------------------------------------------------------------------------------------------------------------------------------|
| <a href="http://news.bbc.co.uk/2/hi/uk_news/scotland/glasgow_and_west/7544704.stm">http://news.bbc.co.uk/2/hi/uk_news/scotland/glasgow_and_west/7544704.stm</a><br><a href="https://www.opticianonline.net/news/minorities-targeted">https://www.opticianonline.net/news/minorities-targeted</a>                                                                                                                                                                                                         | Glasgow (equity project)                                                 | 2008<br><i>Mixed ethnicities</i><br>General eyecare<br>UK              | Few details                                                                                                                                                                                                                                        |
| <a href="https://sightcymru.org.uk/launch-of-a-campaign-drive-to-engage-black-and-ethnic-minority-communities-with-eye-care-at-the-pierhead-cardiff-30th-november-2015/">https://sightcymru.org.uk/launch-of-a-campaign-drive-to-engage-black-and-ethnic-minority-communities-with-eye-care-at-the-pierhead-cardiff-30th-november-2015/</a><br><a href="https://business.senedd.wales/mgCalendarEvent.aspx?id=1537&amp;RPID=0">https://business.senedd.wales/mgCalendarEvent.aspx?id=1537&amp;RPID=0</a> | Cardiff (equity project)                                                 | 2015<br><i>Mixed ethnicities</i><br>General eyecare<br>UK              | Education and screening programme                                                                                                                                                                                                                  |
| <a href="https://ec.europa.eu/eip/ageing/news/promoting-well-being-and-improving-access-eye-care_en.html">https://ec.europa.eu/eip/ageing/news/promoting-well-being-and-improving-access-eye-care_en.html</a>                                                                                                                                                                                                                                                                                            | "P5SE" by Tays Eye Centre                                                | 2016<br><i>Mixed ethnicities</i><br>General eyecare<br><i>Finland</i>  | 'P5SE' Prioritise 'worst outcome' eye diseases, Stratify, based on outcomes, Standardise care pathways, Streamline decision processes, Shared care using multidisciplinary teams, ensure services are Sustainable, and embed continuous Evaluation |
| <a href="https://www.nei.nih.gov/learn-about-eye-health/outreach-campaigns-and-resources/eye-health-among-hispanicslatinos">https://www.nei.nih.gov/learn-about-eye-health/outreach-campaigns-and-resources/eye-health-among-hispanicslatinos</a>                                                                                                                                                                                                                                                        | National Eye Institute (NEI), part of National Institute of Health (NIH) | 2019<br><i>Latinx</i><br>General eyecare<br>USA                        | Targeted awareness and educational materials                                                                                                                                                                                                       |
| <a href="https://cao.memberclicks.net/assets/docs/prioritizing_eye_health_in_hispanic_communities.pdf">https://cao.memberclicks.net/assets/docs/prioritizing_eye_health_in_hispanic_communities.pdf</a>                                                                                                                                                                                                                                                                                                  | Transitions Cultural Connections                                         | NA<br><i>Latinx</i><br>General                                         | In depth recommendations for                                                                                                                                                                                                                       |

|                                                                                                                                                                                                                                                             |                                                                                                                                                                    |                                            |                                                                                        |
|-------------------------------------------------------------------------------------------------------------------------------------------------------------------------------------------------------------------------------------------------------------|--------------------------------------------------------------------------------------------------------------------------------------------------------------------|--------------------------------------------|----------------------------------------------------------------------------------------|
|                                                                                                                                                                                                                                                             | , National Association of Hispanic Nurses                                                                                                                          | eyecare USA                                | patients and providers, covering many aspects of Levesque access framework             |
| <a href="http://bdweb8960p.bluedomino.com/pdf/April2018.pdf">http://bdweb8960p.bluedomino.com/pdf/April2018.pdf</a>                                                                                                                                         | Health Plan San Joaquin eyecare initiatives                                                                                                                        | 2018 <i>Latinx</i> General eyecare USA     | Advertising free eyecare services in local, Spanish newspaper                          |
| <a href="https://mdnewsline.com/latinx-patients-more-affected-by-diabetic-macular-edema/">https://mdnewsline.com/latinx-patients-more-affected-by-diabetic-macular-edema/</a>                                                                               | Affordable Care Act Ventanillas de Salud (VDS) Juntos por la Salud (JPLS)                                                                                          | 2020 <i>Latinx</i> General eyecare USA     | Variety of resources for diabetes                                                      |
| <a href="https://www.glaucoma.org/gleams/hispanic-americans-at-increased-risk-for-glaucoma.php">https://www.glaucoma.org/gleams/hispanic-americans-at-increased-risk-for-glaucoma.php</a>                                                                   | National Eye institute (NEI) EyeCare America ( <i>American Academy of Ophthalmology</i> ) Glaucoma Research Foundation                                             | 2017 <i>Mixed ethnicities</i> General USA  | Variety of resources for glaucoma                                                      |
| <a href="https://www.healio.com/news/ophthalmology/20120331/high-glaucoma-prevalence-in-blacks-leaves-questions-about-treatment">https://www.healio.com/news/ophthalmology/20120331/high-glaucoma-prevalence-in-blacks-leaves-questions-about-treatment</a> | Travatan Project Focus ( <i>Alcon</i> ) Partnership for Sight Initiative ( <i>Allergan</i> ) Glaucoma Eyecare Program ( <i>American Academy of Ophthalmology</i> ) | 2003 <i>Black</i> Glaucoma USA             | Variety of resources for glaucoma. Most including educational and screening components |
| <a href="https://www.iapb.org/blog/improving-access-to-glaucoma-care-a-population-health-priority/">https://www.iapb.org/blog/improving-access-to-glaucoma-care-a-population-health-priority/</a>                                                           | Screening and Intervention for Glaucoma and Eye Health through Telemedicine                                                                                        | 2021 <i>Mixed ethnicities</i> Glaucoma USA | Tele-screening, and follow-up support                                                  |

|  |                      |  |  |
|--|----------------------|--|--|
|  | e (SIGHT)<br>Program |  |  |
|--|----------------------|--|--|
