# Supplementary material for: Interventions to promote access to eyecare for non-dominant ethnic groups in high-income countries: a scoping review
Source: PubMed Central journal article supplement (PMC8424858; doi:10.1136/bmjgh-2021-006188), 2021-09-07
Supplement: bmjgh-2021-006188supp002.pdf [file bmjgh-2021-006188supp002.pdf]

# Supplementary File 2

**Table S2.1. Studies which were not evaluated**

| First Author                | Target Condition     | Target Population            | Colab Design | Intervention description                                                                             | Levesque side prioritised | Results                                                                                                                                                                        |
|-----------------------------|----------------------|------------------------------|--------------|------------------------------------------------------------------------------------------------------|---------------------------|--------------------------------------------------------------------------------------------------------------------------------------------------------------------------------|
| <i>D'Lugoff, 2005 USA</i>   | Diabetic Retinopathy | Black (adults)               | No           | Community screening and education (n=93)                                                             | Provider                  | 93 screened, 31 (33%) referred                                                                                                                                                 |
| <i>Owsley, 2015 USA</i>     | Diabetic Retinopathy | Black (adults)               | No           | Telemedicine screening (n=1894)                                                                      | Provider                  | 22% referred for diabetic retinopathy, 31% cataract, 10% glaucoma                                                                                                              |
| <i>Winters, J, 2008 USA</i> | General              | Mixed ethnicities (adults)   | No           | Integrated services to help coordinate referral to treatment (n=2471)                                | Both                      | 1753 attended appointments, of these: 86% needed and received refraction, 9% had cataracts, 2% glaucoma, 10% glaucoma (or ocular hypertension) suspect 8% diabetic retinopathy |
| <i>Shahid, 2012 USA</i>     | General              | Black (all ages)             | No           | Telemedicine screening and some treatment at soup kitchens (n=341)                                   | Provider                  | 6% referred for significant cataract, 10% for glaucoma, 2% diabetic retinopathy, 13% other vision threatening disease                                                          |
| <i>Feldman, 1977 Canada</i> | General              | Asian (all ages)             | No           | Community assessments (n=235)                                                                        | Both                      | 235 screened, 94 ocular pathology (including refractive error: 45, Cataract: 25)                                                                                               |
| <i>Sanspre, 2008 USA</i>    | General              | Black (all ages)             | Yes          | Community screening treatment programme (n=2699)                                                     | Both                      | 39% referred for refraction (56% spectacles), 8% for cataract, 19% for glaucoma, 2.7% for diabetic retinopathy                                                                 |
| <i>Winters, J, 2008 USA</i> | General              | Black (adults)               | No           | Comprehensive screening and follow-up program (n=89)                                                 | Both                      | All needed and received glasses, 39% referred for cataract, 23% for glaucoma, 15% diabetic retinopathy                                                                         |
| <i>MacLean, 2014 USA</i>    | General              | Mixed ethnicities (adults)   | No           | Community eye exam program connected to training students (n=145)                                    | Provider                  | 26% refractive error 20% cataract, 10% glaucoma suspect, 8% diabetic retinopathy (+ many other specific diagnoses)                                                             |
| <i>Preslan, 1996 USA</i>    | General (children)   | Black (children)             | No           | Screening and treatment programme (n=680)                                                            | Both                      | 11% failed, 8% had refractive errors                                                                                                                                           |
| <i>Kemper, 2004 USA</i>     | General (children)   | Latinx (children)            | No           | Medicaid (n=441584)                                                                                  | Provider                  | 9% accessed eyecare, 5% refractive services                                                                                                                                    |
| <i>Mehravaran, 2016 USA</i> | General (children)   | Latinx (children)            | No           | Screening and treatment programme (n=11260)                                                          | Provider                  | 8% received refractive correction                                                                                                                                              |
| <i>Miller, 1976 USA</i>     | General (children)   | Latinx (children)            | No           | Screening and treatment program (n=8900)                                                             | Provider                  | Referred: 11% (preschool), 20% school-aged                                                                                                                                     |
| <i>Kattouf, 2009 USA</i>    | General (children)   | Mixed ethnicities (children) | No           | Screening, treatment, and education (n=4298)                                                         | Both                      | 17% received spectacles                                                                                                                                                        |
| <i>Hark, 2018 USA</i>       | Glaucoma             | Black (adults)               | Yes          | Comprehensive screening and follow-up program (n=182)                                                | Both                      | 182 screened, 108 (59%) referred, 89 (82%) attended follow-up                                                                                                                  |
| <i>Kikut, 2020 USA</i>      | Glaucoma             | Black (adults)               | No           | Various public health marketing campaigns (radio, TV, postcards, etc) <i>grouped data</i>            | Patient                   | Commercials best, but most expensive, generally spend \$400-\$800 for each participant recruited                                                                               |
| <i>Al-Aswad, 2017 USA</i>   | Glaucoma             | Latinx (adults)              | No           | Community screening (n=8547)                                                                         | Provider                  | 8547 screened, 2118 referred for Glaucoma, 1243 referred for ophthalmic exam                                                                                                   |
| <i>Vistamehr, 2006 USA</i>  | Glaucoma             | Black (adults)               | No           | Screening and treatment programme (n=184)                                                            | Provider                  | Interested in tools for screening, found 81.7% sensitivity and 55% specificity for protocol                                                                                    |
| <i>Dreer, 2016 USA</i>      | Glaucoma             | Black (adults)               | Yes          | Education, motivational interviews, and problem-solving training, carried out by psychologist (n=11) | Patient                   | Pilot results look promising for further research                                                                                                                              |
| <i>Monaghan, 2011 USA</i>   | Injury prevention    | Latinx (adults)              | Yes          | Behavioural activation with CHWs to promote understanding and use of PPE                             | Patient                   | Interview and focus groups showed promising results                                                                                                                            |

(n=74 interviews)

**Table S2.2. Studies with concurrent comparators**

| First Author                                 | Target Condition     | Target Population            | Colab Design | Levesque side prioritised | Intervention 1 description                                                                                                       | Intervention 2 description                             | Intervention 3 description      | Intervention 4 (if usual care)        | Outcome   | Results                                                                           | Effective?   |
|----------------------------------------------|----------------------|------------------------------|--------------|---------------------------|----------------------------------------------------------------------------------------------------------------------------------|--------------------------------------------------------|---------------------------------|---------------------------------------|-----------|-----------------------------------------------------------------------------------|--------------|
| <i>Tjiam, 2013</i><br><i>The Netherlands</i> | General (children)   | Mixed ethnicities (children) | No           | Patient                   | Cartoon information (n=25)                                                                                                       | Parent leaflet information (n=21)                      | Rewards and calendar (n=24)     | Usual care (n=18)                     | Adherence | Intervention 1: 89%, Intervention 2: 73%, Intervention 3: 67%, Usual care: 55%    | Effective    |
| <i>Forst, 2004</i><br><i>USA</i>             | Injury prevention    | Latinx (adults)              | Yes          | Patient                   | Provide free protective eyewear from CHW + CWH training (n=256)                                                                  | Provide free protective eyewear + CHW training (n=298) | Free protective eyewear (n=149) | NA                                    | Adherence | Intervention 1: best uptake of protective eyewear                                 | Effective    |
| <i>Nesher, 2001</i><br><i>Israel</i>         | Glaucoma             | Mixed ethnicities (adults)   | No           | Provider                  | Pre-recorded instructions (n=30)                                                                                                 | Interpreter-assisted instructions (n=30)               | NA                              | NA                                    | Adherence | No difference between groups (authors conclude either is an effective option)     | Inconclusive |
| <i>Monaghan, 2012</i><br><i>USA</i>          | Injury prevention    | Latinx (adults)              | Yes          | Patient                   | Free protective eyewear from CHW + CWH peer modelling/training (grouped data)                                                    | Free protective eyewear (grouped data)                 | NA                              | NA                                    | Adherence | CHW improved use of protective eyewear (note measured by 'crews' not individuals) | Inconclusive |
| <i>Tovar-Aguilar, 2014</i><br><i>USA</i>     | Injury prevention    | Latinx (adults)              | Yes          | Both                      | Free protective eyewear, eye drops + training (grouped data)                                                                     | NA                                                     | NA                              | Usual practice on farm (grouped data) | Adherence | Some promising results (particularly qualitative and pre/post)                    | Inconclusive |
| <i>Prezio, 2014</i><br><i>USA</i>            | Diabetic Retinopathy | Latinx (adults)              | No           | Patient                   | CHW support (7 hours) (n=90)                                                                                                     | NA                                                     | NA                              | Usual care (n=90)                     | Eye exam  | Intervention: 47%, Usual care: 33%                                                | Effective    |
| <i>Davis, 2003</i><br><i>USA</i>             | Diabetic Retinopathy | Black (adults)               | No           | Provider                  | Telemedicine screening (n=30)                                                                                                    | NA                                                     | NA                              | Usual care (n=29)                     | Eye exam  | Intervention: 77%, Usual care: 14%                                                | Effective    |
| <i>Bush, 2014</i><br><i>USA</i>              | Diabetic Retinopathy | Asian (adults)               | No           | Patient                   | Link Worker-implemented telephone call (n=988)                                                                                   | NA                                                     | NA                              | Usual care (n=1692)                   | Eye exam  | Intervention: 89%, Usual care: 74%                                                | Effective    |
| <i>Anderson, 2003</i><br><i>USA</i>          | Diabetic Retinopathy | Black (adults)               | Yes          | Patient                   | Personalised supportive reminder calls (n=67)                                                                                    | NA                                                     | NA                              | Usual care (n=65)                     | Eye exam  | Intervention: 66%, Usual care: 35%                                                | Effective    |
| <i>Basch, 1999</i><br><i>USA</i>             | Diabetic Retinopathy | Black (adults)               | No           | Patient                   | Multicomponent supportive educational intervention (booklet, video, semi structured telephone education and counselling) (n=137) | NA                                                     | NA                              | Usual care (n=143)                    | Eye exam  | Intervention: 55%, Usual care: 27%                                                | Effective    |
| <i>Pizzi, 2015</i><br><i>USA</i>             | Diabetic Retinopathy | Black (adults)               | No           | Patient                   | Reminder + telephone information (n=120)                                                                                         | Reminder + mailed information (n=117)                  | NA                              | Usual care (n=119)                    | Eye exam  | Intervention 1: 51%, Intervention 2: 32%, Usual care: 36%                         | Effective    |

|                           |                      |                            |     |          |                                                                                                 |                                                                                               |                                                                                               |                   |          |                                                                                                                                                                                   |              |
|---------------------------|----------------------|----------------------------|-----|----------|-------------------------------------------------------------------------------------------------|-----------------------------------------------------------------------------------------------|-----------------------------------------------------------------------------------------------|-------------------|----------|-----------------------------------------------------------------------------------------------------------------------------------------------------------------------------------|--------------|
| Weiss, 2015<br>USA        | Diabetic Retinopathy | Black (adults)             | No  | Patient  | Behavioural activation (n=91)                                                                   | Supportive therapy                                                                            | NA                                                                                            | NA                | Eye exam | Intervention 1: 88%, Intervention 2: 34%                                                                                                                                          | Effective    |
| Walker, 2008<br>USA       | Diabetic Retinopathy | Mixed ethnicities (adults) | No  | Patient  | Personalised supportive reminder calls (n=326)                                                  | Information packages                                                                          | NA                                                                                            | NA                | Eye exam | Intervention 1: 34%, Intervention 2: 20%                                                                                                                                          | Effective    |
| Rodriguez, E, 2018<br>USA | General (children)   | Latinx (children)          | No  | Both     | School vision screening program + full time school nurse (n=2800)                               | School vision screening program (n=3445)                                                      | NA                                                                                            | NA                | Eye exam | Intervention 1: 97%, Intervention 2: 67%                                                                                                                                          | Effective    |
| van Zyl                   | Glaucoma             | Mixed ethnicities (adults) | No  | Provider | Counselling + recommended follow up pre-scheduled (n=22)                                        | Counselling + recommended follow up without pre-scheduling (n=41)                             | NA                                                                                            | NA                | Eye exam | Intervention 1: 41%, Intervention 2: 24%                                                                                                                                          | Effective    |
| Zhang, 2009<br>USA        | Diabetic Retinopathy | Black (adults)             | Yes | Patient  | DIRECT program + eyecare education (grouped data)                                               | DIRECT program (grouped data)                                                                 | NA                                                                                            | NA                | Eye exam | Intervention 1: 73%, Intervention 2: 66% (difference not significant)                                                                                                             | Inconclusive |
| Ellish, 2011<br>USA       | General              | Black (adults)             | No  | Patient  | Tailored (individualized) print information (n=137)                                             | targeted (designed for a subgroup) print intervention (n=142)                                 | NA                                                                                            | NA                | Eye exam | Intervention 1: 40%, Intervention 2: 38% (those who read either were 1.8 times more likely to attend)                                                                             | Inconclusive |
| Hark, 2016<br>USA         | Glaucoma             | Black (adults)             | Yes | Both     | Follow-up eye care in a community-based setting with assistance from a patient navigator (n=53) | Follow-up eye care in an office-based setting with assistance from a patient navigator (n=57) | Follow-up eye care in an office-based setting without a patient navigator (usual care) (n=45) | NA                | Eye exam | Intervention 1: 70%, Intervention 2: 83%, Intervention 3: 73% (not significant; all follow-up attendance very good, and other metrics showed intervention 1 to be most effective) | Inconclusive |
| Aleo, 2015<br>USA         | Diabetic Retinopathy | Black (adults)             | No  | Patient  | Sign contracts (n=42)                                                                           | NA                                                                                            | NA                                                                                            | Usual care (n=41) | Eye exam | Intervention: 38%, Usual care: 44%                                                                                                                                                | Ineffective  |
| Meng, 2016<br>USA         | Diabetic Retinopathy | Mixed ethnicities (adults) | No  | Patient  | Medicaid + disease management programme (n=2933)                                                | NA                                                                                            | NA                                                                                            | Medicaid (n=2988) | Eye exam | Disparity in follow-up eye exams remained despite intervention (although it helped some non-dominant groups more than others)                                                     | Ineffective  |
| Owsley, 2013<br>USA       | General              | Black (adults)             | Yes | Both     | InCharge group education (n=54)                                                                 | Information on physical activity (n=63)                                                       | NA                                                                                            | NA                | Eye exam | Eye-specific training did not improve attendance (No pre to post improvement on survey results either)                                                                            | Ineffective  |
| Welch, 2011<br>USA        | Diabetic Retinopathy | Latinx (adults)            | Yes | Both     | Interactive web-based diabetes management tool (n=21)                                           | Attention control (n=18)                                                                      | NA                                                                                            | NA                | Health   | More improvement in A1c in Intervention 1                                                                                                                                         | Effective    |

|                               |                      |                            |     |          |                                                                                                                                                      |                          |    |                               |          |                                                                                                                                |              |
|-------------------------------|----------------------|----------------------------|-----|----------|------------------------------------------------------------------------------------------------------------------------------------------------------|--------------------------|----|-------------------------------|----------|--------------------------------------------------------------------------------------------------------------------------------|--------------|
| Vaughan, 2017<br>USA          | Diabetic Retinopathy | Latinx (adults)            | No  | Both     | CHW lead group education/support/behavioural activation (n=25)                                                                                       | NA                       | NA | Usual care (n=25)             | Health   | Group sessions improved target A1c levels, and screening rate (Intervention: 57%, Usual care: 25% achieved target A1c levels)  | Effective    |
| Rovner, 2019<br>USA           | Diabetic Retinopathy | Black (adults)             | No  | Provider | Culturally tailored behavioural health/ophthalmologic intervention called Collaborative Care for Depression and Diabetic Retinopathy (CC-DDR) (n=16) | NA                       | NA | Enhanced usual care (n=17)    | Health   | Difference was not significant between interventions, but whether patients trusted the ophthalmologist was an important factor | Inconclusive |
| Earle-Richardson, 2014<br>USA | Injury prevention    | Latinx (adults)            | Yes | Patient  | Eye drops, protective eyewear, and an in-person presentation and pocket card on eye health (including how to use the eye drops and eyewear) (n=59)   | NA                       | NA | Usual practice on farm (n=61) | Health   | Eye pain decreased significantly, but redness, blurred vision, itch, and dry feeling did not                                   | Inconclusive |
| Mehranbod, 2020<br>USA        | Diabetic Retinopathy | Latinx (adults)            | No  | Patient  | Automated reminder call (n=184)                                                                                                                      | NA                       | NA | Usual care (n=117)            | Screened | intervention: 60%, control: 46%                                                                                                | Effective    |
| Moussa, 2013<br>USA           | Diabetic Retinopathy | Black (adults)             | No  | Patient  | E-health interactive tutorials (n=23)                                                                                                                | Print information (n=23) | NA | NA                            | Survey   | Difference in knowledge not significant between interventions (but pre-post improved with both interventions)                  | Effective    |
| Wagner, 2008<br>USA           | Diabetic Retinopathy | Mixed ethnicities (adults) | No  | Patient  | Patient education (n=45)                                                                                                                             | NA                       | NA | Usual care (n=45)             | Survey   | Knowledge improved                                                                                                             | Effective    |

Table S2.3. Studies with sequential comparators

| First Author                   | Target Condition     | Target Population            | Colab Design | Levesque side prioritised | Intervention description                                                                                                                           | Outcome                                | Results                                                                          | Effective?   |
|--------------------------------|----------------------|------------------------------|--------------|---------------------------|----------------------------------------------------------------------------------------------------------------------------------------------------|----------------------------------------|----------------------------------------------------------------------------------|--------------|
| Tjiam, 2012<br>The Netherlands | General (children)   | Mixed ethnicities (children) | No           | Patient                   | Cartoon information (n=65)                                                                                                                         | Adherence                              | Several adherence-related metrics improved                                       | Effective    |
| Snipes, 2015<br>USA            | Injury prevention    | Latinx (adults)              | No           | Patient                   | Free protective eyewear + tailored reminders (n=41)                                                                                                | Adherence                              | Use improved                                                                     | Effective    |
| Luque, 2007<br>USA             | Injury prevention    | Latinx (adults)              | Yes          | Patient                   | Free protective eyewear + peer education + peer modelling of wear (n=427)                                                                          | Adherence                              | Use and perceptions improved                                                     | Effective    |
| Jenkins, C, 2004<br>USA        | Diabetic Retinopathy | Black (adults)               | Yes          | Both                      | Integrated screening, treatment, empowerment, re-imburement, and education program (n=270)                                                         | Eye exam                               | Pre: 21%<br>Post: 43%                                                            | Effective    |
| Hong, 2019<br>USA              | General (children)   | Black (children)             | No           | Provider                  | Universal pre-kindergarten program (53,000 enrolled)                                                                                               | Eye exam                               | Diagnosis: improved by 55%<br>Treatment: improved by 45%<br>(both from baseline) | Effective    |
| Zhao, 2018<br>USA              | Glaucoma             | Black (adults)               | No           | Both                      | STOP + Financial incentives, educational videos, race concordance with screeners, and making follow up appointments close to the time of screening | Eye exam                               | Pre: 47% (STOP only)<br>Post: 64% (STOP + )                                      | Effective    |
| Chedid, 2013<br>USA            | Diabetic Retinopathy | Black (adults)               | No           | Provider                  | program + improved staff training, referral processes and patient reminder calls (grouped data, compared to initial program)                       | Eye exam                               | Pre: 20%<br>Post: 71%                                                            | Inconclusive |
| Draper, 2016<br>USA            | General              | Black (adults)               | No           | Provider                  | Home-based low vision services (n=24) and clinic-based services (n=24)                                                                             | Health (Self-report functional vision) | Pre/post improvement (no difference between home and clinic based)               | Effective    |
| Baker, S, 1993<br>USA          | Diabetic Retinopathy | Black (adults)               | Yes          | Both                      | Comprehensive program with patient management system (n=1164, 744 at 2 <sup>nd</sup> time point)                                                   | Health (Incidence of blindness)        | Pre: 9.5/1,000<br>Post: 2.7/1,000 (across 4-years)                               | Effective    |
| Jani, 2017<br>USA              | Diabetic Retinopathy | Black (adults)               | No           | Provider                  | Telemedicine screening (n=1661)                                                                                                                    | Screened                               | Pre: 25%<br>Post: 40%,                                                           | Effective    |
| Lee, S, 2000<br>Australia      | Diabetic Retinopathy | Mixed ethnicities (adults)   | No           | Both                      | Multi-faceted recruitment (print, radio, newsletter, etc) (n=1197)                                                                                 | Screened                               | Pre: 55%<br>Post: 70%                                                            | Effective    |
| Olayiwola, 2011<br>USA         | Diabetic Retinopathy | Mixed ethnicities (adults)   | Yes          | Provider                  | Telemedicine screening (grouped data)                                                                                                              | Screened                               | Pre: 10-12%<br>Post: 20%,                                                        | Effective    |
| Taylor, C, 2007<br>USA         | Diabetic Retinopathy | Mixed ethnicities (adults)   | No           | Provider                  | Telemedicine screening and coordination of services (n=495)                                                                                        | Screened                               | Pre: 23%<br>Post: 59%                                                            | Effective    |
| Navuluri, 2000<br>USA          | Diabetic Retinopathy | Latinx (adults)              | No           | Patient                   | Community screening and education (n=19)                                                                                                           | Survey                                 | Knowledge on survey increased                                                    | Effective    |
| DeNomie, 2019<br>USA           | Diabetic Retinopathy | Latinx (adults)              | Yes          | Provider                  | Telemedicine screening (n=17)                                                                                                                      | Survey                                 | Satisfaction high within focus groups                                            | Effective    |
| Frazier, 2012<br>USA           | General (children)   | Latinx (children)            | Yes          | Patient                   | Print information (n=42)                                                                                                                           | Survey                                 | Knowledge improved                                                               | Effective    |
| Kharod, 2006<br>USA            | Glaucoma             | Black (adults)               | No           | Provider                  | Translated, written instructions for glaucoma medication (n=164)                                                                                   | Survey                                 | Knowledge of medication improved                                                 | Effective    |
| Baker, H, 2008<br>USA          | Glaucoma             | Asian (adults)               | No           | Patient                   | Various public health education campaigns (television, local radio, local press, places of worship) (n=306)                                        | Survey                                 | Knowledge of glaucoma improved (radio most effective)                            | Effective    |
| Rhodes, 2016<br>USA            | Glaucoma             | Black (adults)               | No           | Patient                   | Education program (EQUALITY) (n=651)                                                                                                               | Survey                                 | Knowledge and perceptions improved                                               | Effective    |
| Owsley, 2008<br>USA            | General              | Black (adults)               | Yes          | Both                      | InCharge group education (n=85)                                                                                                                    | Survey                                 | Improvement not statically significant                                           | Inconclusive |

**Table S2.4. Papers associated with other studies**

| First Author                   | Key or final paper in the study                                          | Target Condition     | Target Population          | Levesque side prioritised | Intervention description                                                                                     | Results                                                                                                                                                               |
|--------------------------------|--------------------------------------------------------------------------|----------------------|----------------------------|---------------------------|--------------------------------------------------------------------------------------------------------------|-----------------------------------------------------------------------------------------------------------------------------------------------------------------------|
| Anderson, 2002<br>USA          | Anderson, 2003                                                           | Diabetic Retinopathy | Black (adults)             | Both                      | Host of culturally relevant interventions aimed at patient side of access (including behavioural activation) | Many barriers exist at a wider-systems and provider level, which are difficult to overcome                                                                            |
| Jones, H, 2010<br>USA          | Walker, 2008                                                             | Diabetic Retinopathy | Mixed ethnicities          | Patient                   | Personalised reminder calls (n=305) further explored                                                         | Rapport is perhaps more important than race-concordance                                                                                                               |
| Casten, 2011<br>USA            | Weiss, 2015                                                              | Diabetic Retinopathy | Black (adults)             | Patient                   | Early results from behavioural activation vs supportive therapy                                              | Knowledge improved after intervention                                                                                                                                 |
| Winters, D, 2017<br>USA        |                                                                          | Diabetic Retinopathy | Black (adults)             | Patient                   | Cost effectiveness comparison of behavioural activation vs supportive therapy                                | Behaviour activation costs more than supportive therapy, but behavioural activation is more effective, so better cost by outcome                                      |
| Murchison, 2016<br>USA         | Owsley, 2015                                                             | Diabetic Retinopathy | Mixed ethnicities (adults) | Provider                  | Community telemedicine screening (n=1914 across 4 sites)                                                     | 25% - some level of diabetic retinopathy                                                                                                                              |
| Jani, 2017<br>USA              | Jani, 2017                                                               | Diabetic Retinopathy | Black (adults)             | Provider                  | Geographic information systems to link need with allocation of telemedicine screening services               | Geographic information systems mapping can highlight areas of higher access needs                                                                                     |
| Zhao, 2017<br>USA              | Zhao, 2018                                                               | Glaucoma             | Black (adults)             | Both                      | Comprehensive screening and follow-up program (n=901)                                                        | Ocular outcomes: 15% significant eye disease (including 8.7% glaucoma, 6.8% cataract), and 12% refractive error                                                       |
| Sapru, 2017<br>USA             | Hark, 2016 and Rhodes, 2016                                              | Glaucoma             | Black (adults)             | Both                      | Comprehensive screening and follow-up program                                                                | Detection and treatment rates: 38% glaucoma related diagnosis, 12% treated, 99% satisfaction                                                                          |
| Hark, 2016<br>USA (PGDTP)      | Hark, 2016                                                               | Glaucoma             | Black (adults)             | Both                      | Comprehensive screening and follow-up program (n=1649)                                                       | Education: Knowledge improved on survey (pre/post)                                                                                                                    |
| Waisbourd, 2016<br>USA (PGDTP) |                                                                          | Glaucoma             | Black (adults)             | Both                      | Comprehensive screening and follow-up program (n=1649)                                                       | Detection and treatment rates: 38% glaucoma related diagnosis, 12% treated, 99% satisfaction                                                                          |
| Zheng, C, 2016<br>USA (PGDTP)  |                                                                          | Glaucoma             | Black (adults)             | Both                      | Comprehensive screening and follow-up program (n=1649)                                                       | Barriers to access: lower than hoped screening numbers, and only 25% follow up.                                                                                       |
| Pizzi, 2018<br>USA (PGDTP)     |                                                                          | Glaucoma             | Black (adults)             | Both                      | Comprehensive screening and follow-up program (n=1649)                                                       | Cost analysis: relatively small cost for number of issues identified                                                                                                  |
| Adeghate, 2019<br>USA (PGDTP)  |                                                                          | Glaucoma             | Black (adults)             | Both                      | Comprehensive screening and follow-up program (n=249)                                                        | Glaucoma detection and treatment: 249 completed eye exam, 90 attended follow up, 47 glaucoma related diagnosis (20 treated with drops, 26 treated with laser therapy) |
| Hark, 2019<br>USA (PTGDF)      | Key results not out at time of writing (*Hark, 2018 reported as 'study') | Glaucoma             | Black (adults)             | Both                      | Comprehensive screening and follow-up program (n=906)                                                        | Diagnostic confirmation: 906 screened, 536 invited to and 347 attended second visit (same location).                                                                  |
| Hark, 2020<br>USA (PTGDF)      |                                                                          | Glaucoma             | Black (adults)             | Both                      | Comprehensive screening and follow-up program (n=347)                                                        | Cataracts: 906 screened, 347 completed follow up, 267 had cataracts, 38 visually significant                                                                          |
